# Supplementary material for: Bi-functional nature of nanoceria: pro-drug and drug-carrier potentiality towards receptor-mediated targeting of doxorubicin
Source: Royal Society of Chemistry journal article supplement (doi:10.1039/d0nj02895a), 2020-01-01
Supplement: d0nj02895a1.pdf [file d0nj02895a1.pdf]

## Supporting Information

### Bi-Functional Nature of Nanoceria: Pro-Drug and Drug-carrier potentiality towards receptor mediated targeting of doxorubicin

Madhura A. Damle<sup>a,b</sup>, Varsha G. Shetty<sup>c</sup>, Alok P. Jakhade<sup>a</sup>, Ruchika Kaul-Ghanekar<sup>c</sup>, Rajeev C. Chikate<sup>a\*</sup>

<sup>a</sup>Nanoscience Group, Department of Chemistry, Post-graduate & Research Center, MES Abasaheb Garware College, Karve Road, Pune-411004, India.

<sup>b</sup>Department of Biotechnology, MES Abasaheb Garware College, Karve Road, Pune-411004, India.

<sup>c</sup>Cell and Translational Research Laboratory, Interactive Research School for Health Affairs (IRSHA), Bharati Vidyapeeth University Medical College Campus, Dhankawadi, Pune, Maharashtra, India

\*Corresponding author: email: [rajuchikate29@gmail.com](mailto:rajuchikate29@gmail.com), [rajeev.chikate@mesagec.org](mailto:rajeev.chikate@mesagec.org)

**Fax:** +91-20-25438165; **Tel:** +91-20-41038216

#### List of Figures

**Figure S1:** Figure S1: UV spectra of CeO<sub>2</sub> nanoconjugates

**Figure S2:** TEM images of (a) CeO<sub>2</sub> NPs, (b) PEG-CeO<sub>2</sub> NPs (Inset SAED)

**Figure S3:** The % stability of the nanoconjugates over a period of 48 h.

**Figure S4:** DLS (a, c & e) and Zeta Potential (b, d & f) for CeO<sub>2</sub>-DOX (a, b), CeO<sub>2</sub>-(DOX-FA) (c, d) and CeO<sub>2</sub>-PEG-(DOX-FA) (e, f).

**Figure S5:** Redox potentials of uncoated CeO<sub>2</sub> NPs (a, b) and PEGylated NPs (c, d) at pH 4.4 and 9.2 respectively.

**Figure S6:** DNA binding assay for (a) uncoated and (b) PEG-CeO<sub>2</sub> NPs

**Figure S7:** Cell viability of 293T Cells on treatment with (a) CeO<sub>2</sub> NPs ; (b) PEG-CeO<sub>2</sub> NPs

**Figure S8:** Cell viability studies on MCF-7 cells after exposure to PEG, FA and DMSO at different concentration (0.25-2 µg/mL)

**Figure S9:** Monochromal images of MCF-7 cells by confocal microscopy on treatment with CeO<sub>2</sub> NPs and its nanoconjugates, a: Control cells, b: DOX, c: CeO<sub>2</sub>, d: PEG-CeO<sub>2</sub>, e: CeO<sub>2</sub>-DOX, f: CeO<sub>2</sub>-(DOX-FA), g & h: PEG-CeO<sub>2</sub>-(DOX-FA)

**Table T1:** IC<sub>50</sub> values for the DOX loaded CeO<sub>2</sub> nanoconjugates

**Total No. of Figures – 7**

**Total No. of Tables – 1**

**Figure S1:** UV spectra of CeO<sub>2</sub> nanoconjugates

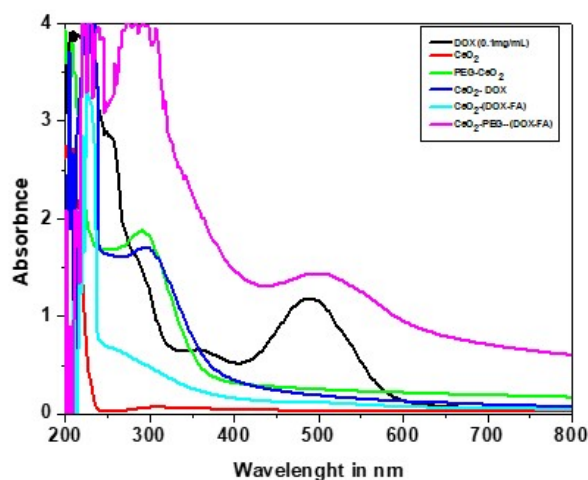

**Figure S2:** TEM images of (a) CeO<sub>2</sub> NPs and (b) PEG-CeO<sub>2</sub> NPs. (Inset SAED)

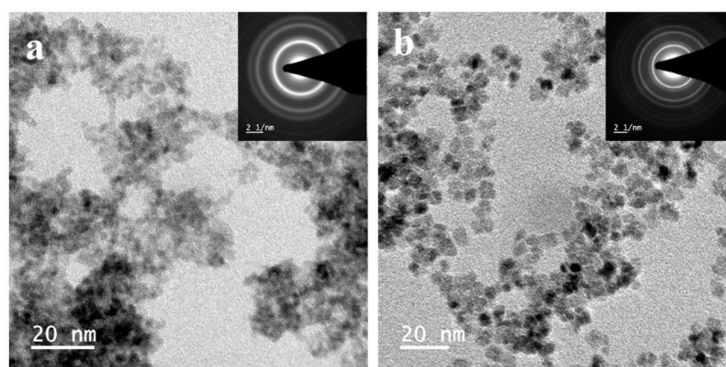

**Figure S3:** The % stability of the nanoconjugates over a period of 48 h.

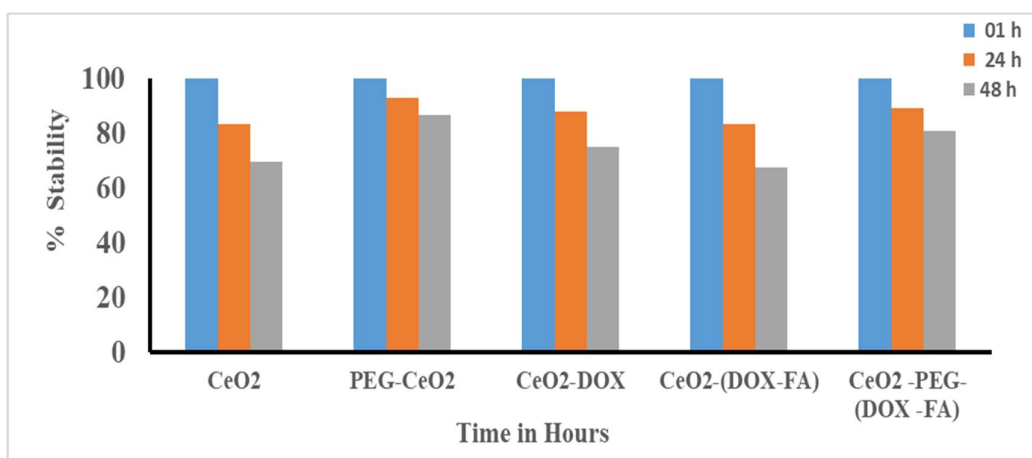

**Figure S4:** DLS (a, c & e) and Zeta Potential (b, d & f) for CeO<sub>2</sub>-DOX (a, b), CeO<sub>2</sub>-(DOX-FA) (c, d) and CeO<sub>2</sub>- PEG-(DOX-FA) (e, f).

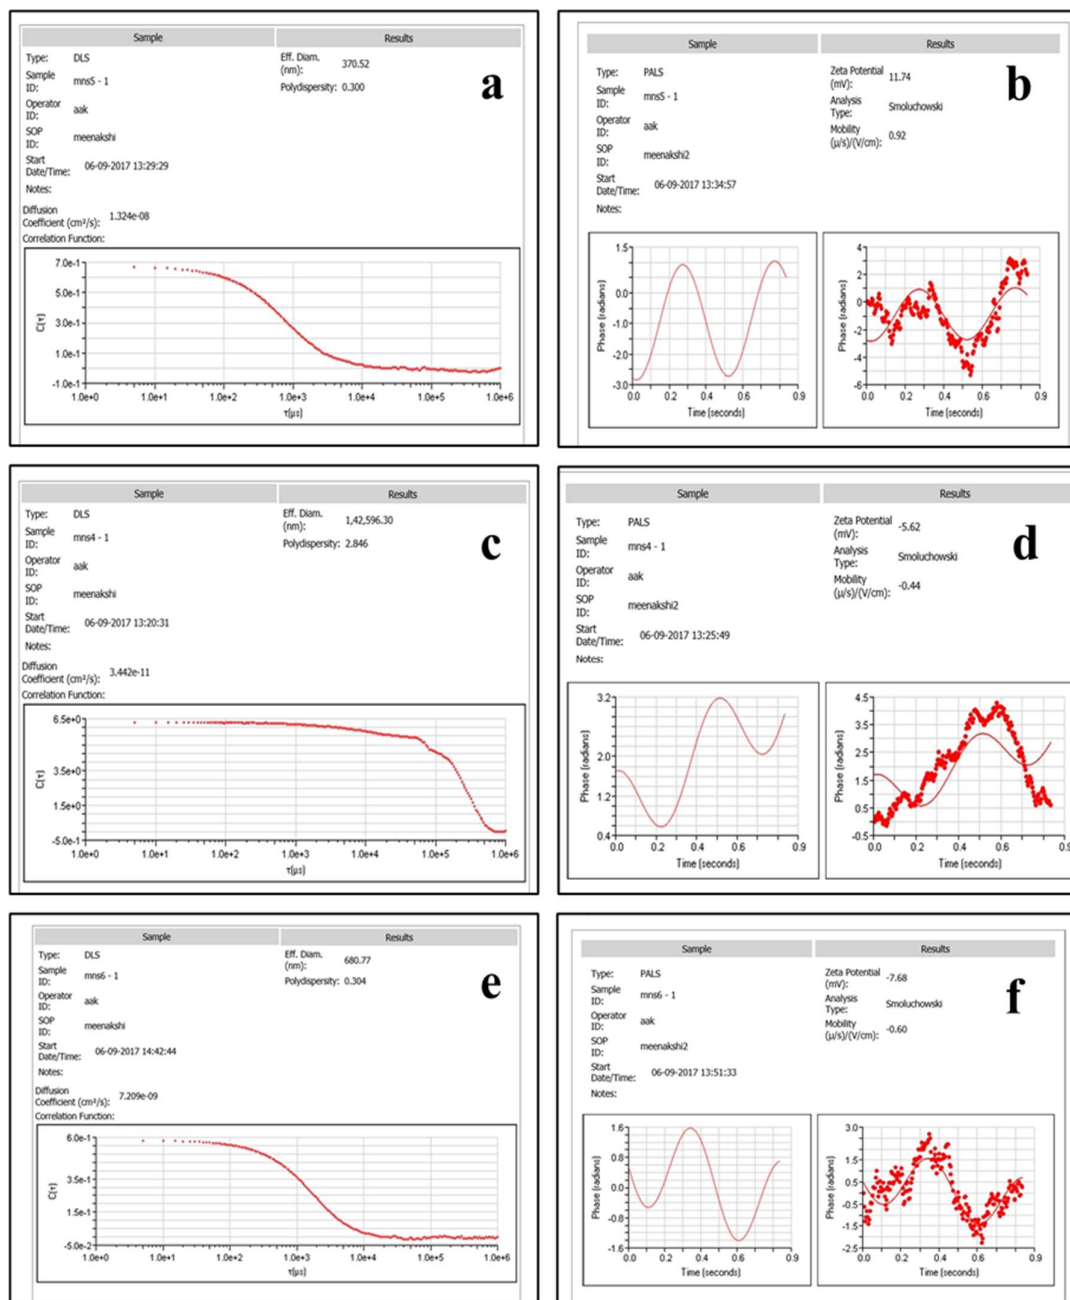

**Figure S5:** Redox potentials of uncoated CeO<sub>2</sub> NPs (a, b) and PEGylated NPs (c, d) at pH 4.4 and 9.2 respectively.

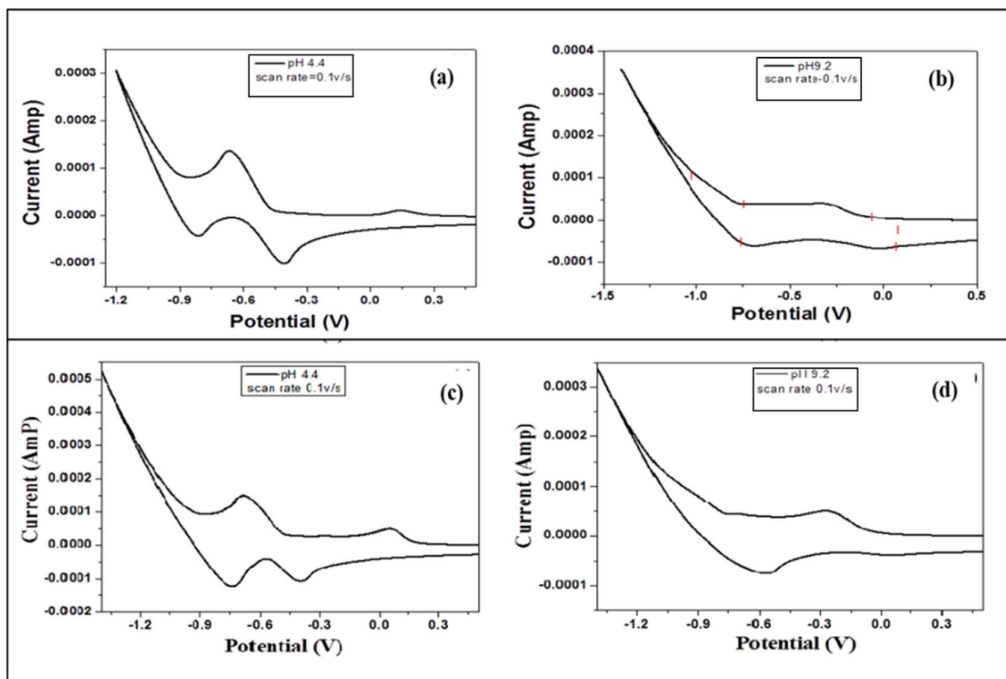

**Figure S6:** DNA binding assay for uncoated (a) and PEG CeO<sub>2</sub> NPs (b)

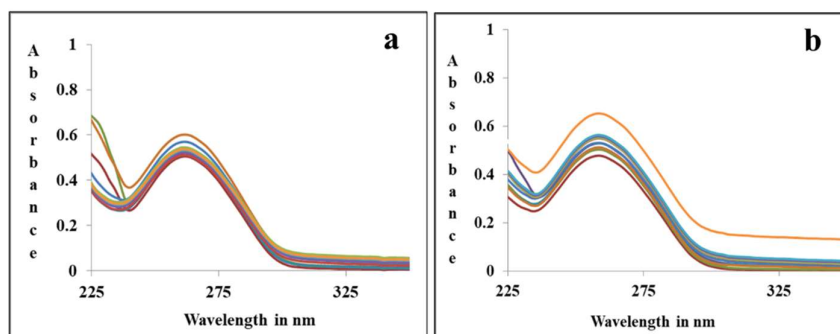

**Figure S7:** Cell viability of 293T Cells on treatment with (a) CeO<sub>2</sub> NPs and (b) PEG-CeO<sub>2</sub> NPs

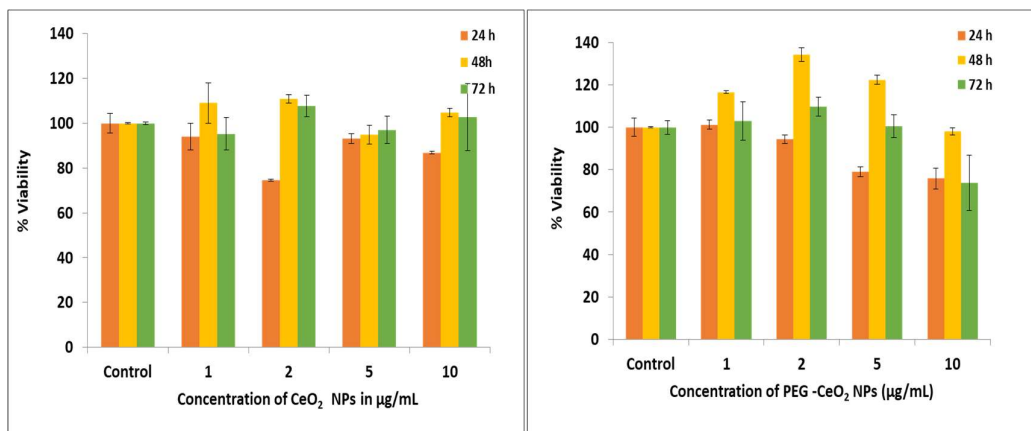

**Figure S8:** Cell viability studies on MCF-7 cells after exposure to PEG, FA and DMSO at different concentration (0.25-2  $\mu\text{g/mL}$ )

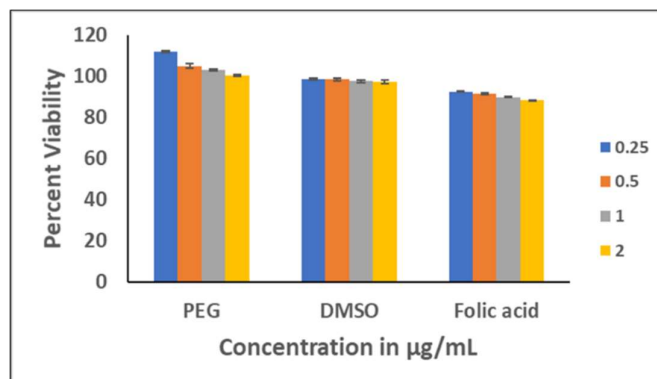

**Figure S9:** Monochromal images of MCF-7 cells by confocal microscopy on treatment with  $\text{CeO}_2$  NPs and its nanoconjugates, a: Control cells, b: DOX, c:  $\text{CeO}_2$ , d: PEG- $\text{CeO}_2$ , e:  $\text{CeO}_2$ -DOX, f:  $\text{CeO}_2$ -(DOX-FA), g & h: PEG- $\text{CeO}_2$ -(DOX-FA)

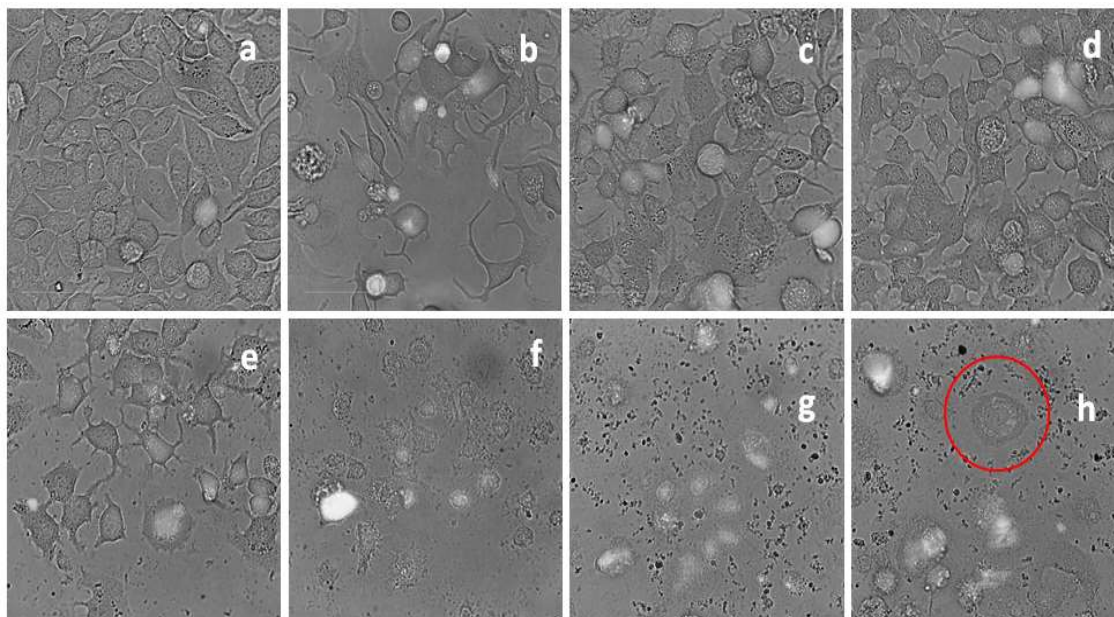

**Table T1:** IC<sub>50</sub> values of DOX-conjugated metal-based nanocarriers against MCF-7

| Sr. No. | Compound                                                       | DOX loading (wt.%) | IC <sub>50</sub> (µg/mL) | Ref.         |
|---------|----------------------------------------------------------------|--------------------|--------------------------|--------------|
| 1       | CaCO <sub>3</sub> -DOX                                         | 19.3               | 1.83                     | 1            |
| 2       | DOX-DNA@CaP                                                    | 12.4               | 0.68                     | 2            |
| 3       | Chitosan-CuO-DOX                                               | 15.97              | 30.0                     | 3            |
| 4       | Chitosan-SiO <sub>2</sub> -Fe <sub>3</sub> O <sub>4</sub> -DOX | 19.81              | 1.5                      | 4            |
| 5       | Au-GA-DOX                                                      | 9.1                | 0.15                     | 5            |
| 6       | Ti-MIL 125-DOX                                                 | 25                 | 5.62                     | 6            |
| 7       | CeO <sub>2</sub> -DOX                                          | 12                 | 3.54                     | Present work |
| 8       | CeO <sub>2</sub> -(DOX-FA)                                     | 5.9                | 3.28                     |              |
| 9       | CeO <sub>2</sub> -PEG-(DOX-FA)                                 | 2.3                | 3.09                     |              |

1. A. Hamidu, A. Mokrish, R. Mansor, I.S.A. Razak, A. Danmaigoro, A.Z. Jaji and Z.A. Bakar, Modified methods of nanoparticles synthesis in pH-sensitive nano-carriers production for doxorubicin delivery on MCF-7 breast cancer cell line, *Inter. J. Nanomedicine*, 2019, **14**, 3615.
2. J. Liu, L. Li, R. Zhang and Z.P. Xu, Development of CaP nanocomposites as photothermal actuators for doxorubicin delivery to enhance breast cancer treatment, *J. Mater. Sci. Technol.*, 2020 (accepted manuscript), DOI.org/10.1016/j.jmst.2020.02.029.
3. N.B. Varukattu, R. Vivek, C. Rejeeth, R. Thangam, T. Ponraj, A. Sharma and S. Kannan, Nanostructured pH-responsive biocompatible chitosan coated copper oxide nanoparticles: A polymeric smart intracellular delivery system for doxorubicin in breast cancer cells, *Arabian J. Chem.*, 2020, **13**, 2276.
4. M. Rahimi, K.D. Safa, E. Alizadeh and R. Salehi, Dendritic chitosan as a magnetic and biocompatible nanocarrier for the simultaneous delivery of doxorubicin and methotrexate to MCF-7 cell line, *New J. Chem.*, 2017,**41**, 3177.
5. W.I. El-Ghareb, M.M. Swidan, I.T. Ibrahim, A.A. ElBary, M.I. Tadros and T.M. Sakr, <sup>99m</sup>Tc-Doxorubicin-loaded gallic acid-gold nanoparticles (<sup>99m</sup>Tc-DOX-loaded GA-Au NPs) as a multifunctional theranostic agent, *Inter.J.Pharmaceutics*, 2020 (accepted manuscript), : DOI.org/10.1016/j.ijpharm.2020.119514
6. J.L. Song, Z.Q. Huang, J. Mao, W.J. Chen, B. Wang, F.W. Yang, S.H. Liu, H.J. Zhang, L.P. Qiu, J.H. Chen, A facile synthesis of uniform hollow MIL-125 titanium-based nanoplatform for endosomal escape and intracellular drug delivery, *Chem. Eng. J.*, 2020, **396**, 125246.
